# Supplementary material for: New crystalline aluminum alkoxide oxide fluorides: Evidence of the mechanism of the fluorolytic sol–gel reaction
Source: Royal Society of Chemistry journal article supplement (doi:10.1039/c1dt10514k), 2011-01-01
Supplement: c1dt10514k.pdf [file c1dt10514k.pdf]

## Electronic Supplementary Information

### Fig. S1

Schematic representation of the unit cell of compound **2** with emphasis of the Al-F-O-backbones of the molecular structures in the unit cell. H- and C-atoms and labels are omitted for clarity.

### Fig. S2

FT-IR-spectrum of the crystalline aluminum isopropoxide fluoride **1** in comparison with the FT-IR spectrum of Al(O<sup>*i*</sup>Pr)<sub>3</sub>.

### Fig. S3

<sup>1</sup>H→<sup>13</sup>C CP MAS NMR spectrum of **1** ( $\nu_{\text{rot}} = 10$  kHz) in comparison with the CP MAS NMR spectrum of crystalline Al(O<sup>*i*</sup>Pr)<sub>3</sub> ( $\nu_{\text{rot}} = 10$  kHz).

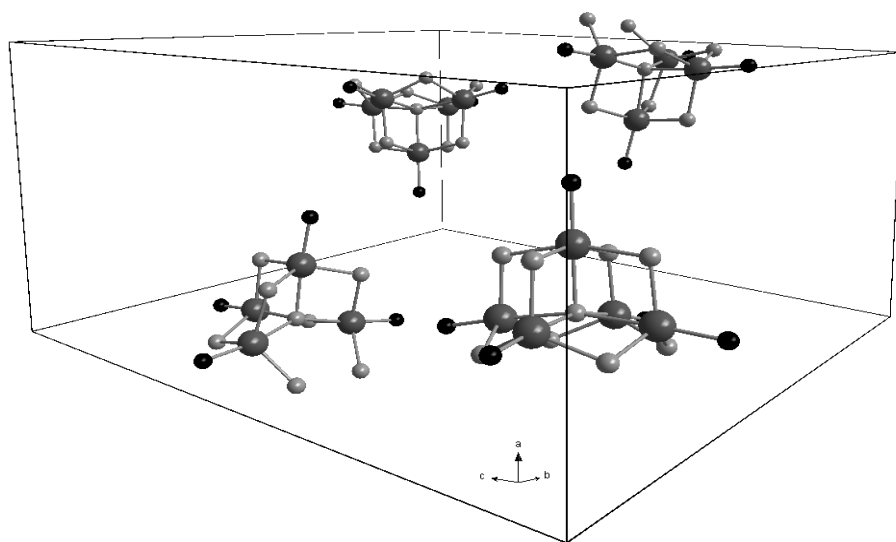

Fig. S1

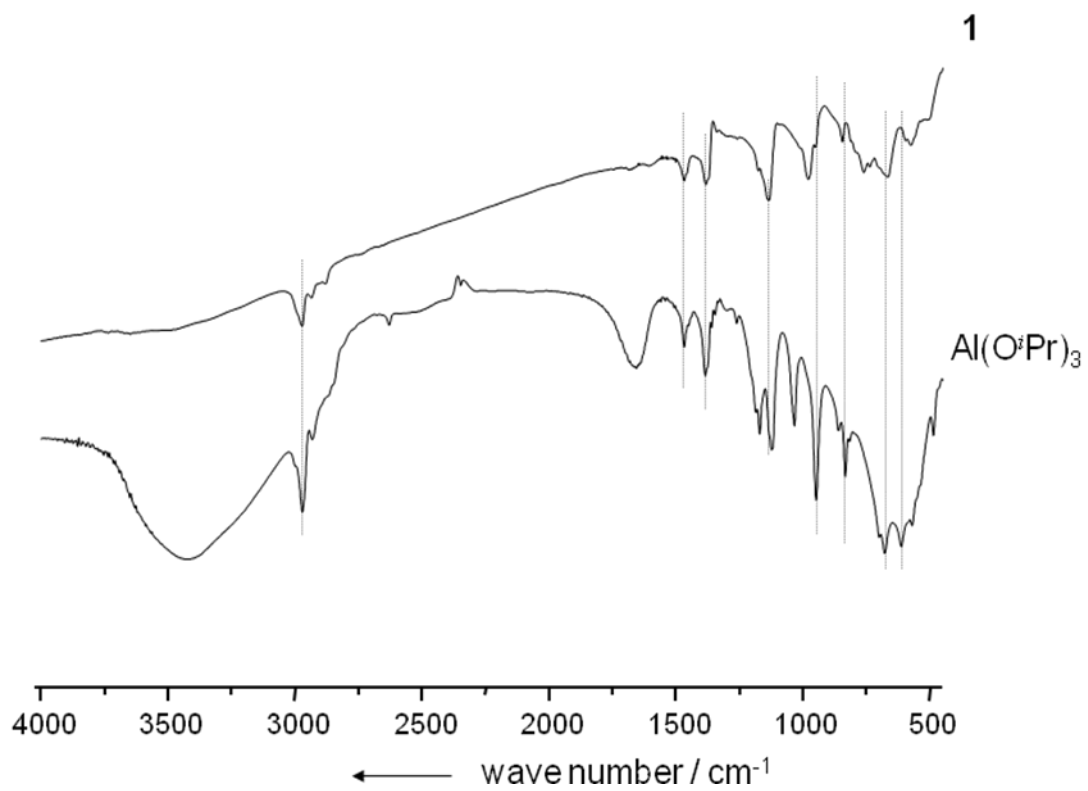

Fig. S2

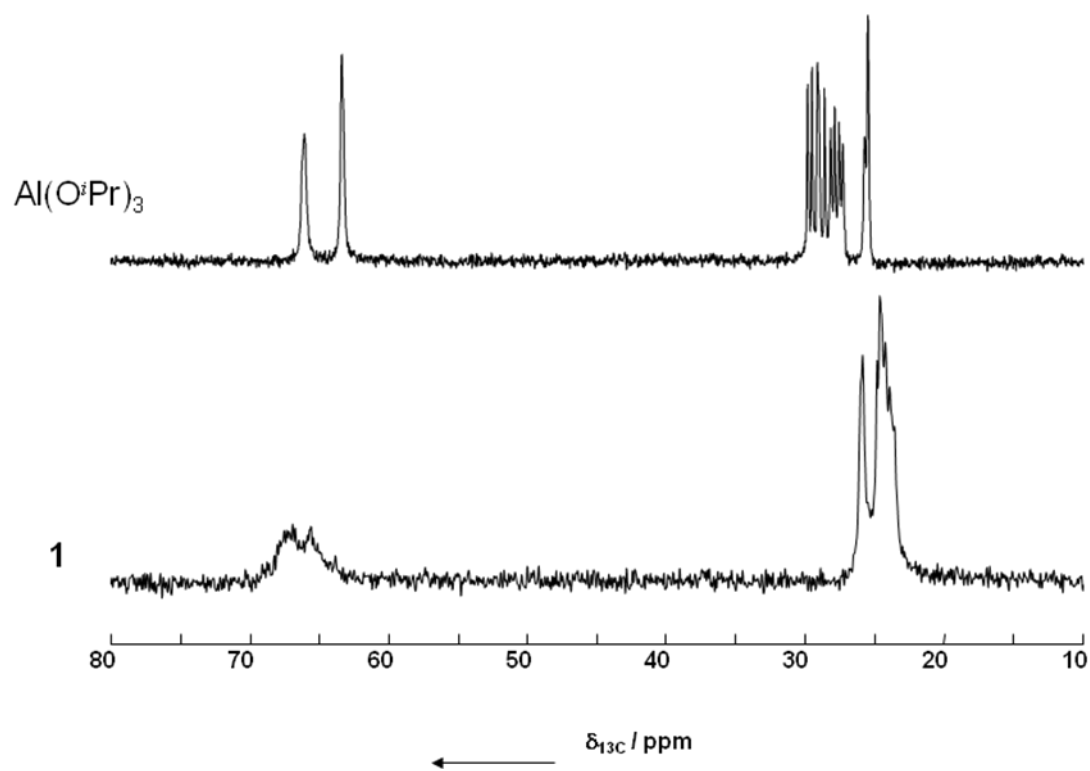

Fig. S3
